# Supplementary material for: The use of phosphate rock and plant growth promoting microorganisms for the management of Urochloa decumbens (Stapf.) R.D. Webster in acidic soils
Source: PeerJ. 2024 Dec 6;12:e18610. doi: 10.7717/peerj.18610 (PMC11627078; doi:10.7717/peerj.18610)
Supplement: Supplemental Information 2 [file peerj-12-18610-s002.xlsx]

## Sheet: Solubilization Data
Isolation	Medium	Phosphate	Colony diameter (mm)		Isolation	Medium	Phosphate	Colony diameter (mm)		Isolation	Medium	Phosphate	Colony diameter (mm)
C5	MinimumM	HA	1.52		C5	Manita	HA	1.09		C5	Red Congo	HA	3
C5	MinimumM	HA	1.9		C5	Manita	HA	1.7		C5	Red Congo	HA	4.5
C5	MinimumM	HA	1.12		C5	Manita	HA	1.61		C5	Red Congo	HA	4
C55	MinimumM	HA	1.22		C55	Manita	HA	0.33		C55	Red Congo	HA	2.7
C55	MinimumM	HA	1.23		C55	Manita	HA	0.92		C55	Red Congo	HA	3.9
C55	MinimumM	HA	2.03		C55	Manita	HA	0.7		C55	Red Congo	HA	2.5
A10	MinimumM	HA	1.72		A10	Manita	HA	1.33		A10	Red Congo	HA	2.4
A10	MinimumM	HA	1.35		A10	Manita	HA	0.58		A10	Red Congo	HA	1.4
A10	MinimumM	HA	0.89		A10	Manita	HA	1		A10	Red Congo	HA	2.3
A11	MinimumM	HA	0.96		A11	Manita	HA	nc		A11	Red Congo	HA	2.5
A11	MinimumM	HA	1		A11	Manita	HA	nc		A11	Red Congo	HA	1.2
A11	MinimumM	HA	1.7		A11	Manita	HA	nc		A11	Red Congo	HA	2.3
A4	MinimumM	HA	nc		A4	Manita	HA	nc		A4	Red Congo	HA	2.4
A4	MinimumM	HA	nc		A4	Manita	HA	nc		A4	Red Congo	HA	1.3
A4	MinimumM	HA	nc		A4	Manita	HA	nc		A4	Red Congo	HA	2.2
C11	MinimumM	HA	2.91		C11	Manita	HA	2.12		C11	Red Congo	HA	5.3
C11	MinimumM	HA	2.33		C11	Manita	HA	2.7		C11	Red Congo	HA	3.96
C11	MinimumM	HA	1.61		C11	Manita	HA	1.5		C11	Red Congo	HA	3.13
C17	MinimumM	HA	2.12		C17	Manita	HA	2.69		C17	Red Congo	HA	2.53
C17	MinimumM	HA	1.43		C17	Manita	HA	3.32		C17	Red Congo	HA	4.15
C17	MinimumM	HA	2.76		C17	Manita	HA	2.22		C17	Red Congo	HA	2.17
A5	MinimumM	HA	0.93		A5	Manita	HA	nc		A5	Red Congo	HA	1.75
A5	MinimumM	HA	1.45		A5	Manita	HA	nc		A5	Red Congo	HA	0.82
A5	MinimumM	HA	1.98		A5	Manita	HA	nc		A5	Red Congo	HA	1.9
A3	MinimumM	HA	3.11		A3	Manita	HA	nc		A3	Red Congo	HA	3.2
A3	MinimumM	HA	1.65		A3	Manita	HA	nc		A3	Red Congo	HA	1.5
A3	MinimumM	HA	2.76		A3	Manita	HA	nc		A3	Red Congo	HA	2.9
C5	MinimumM	AlPO4	1.11		C5	Manita	AlPO4	1.34		C5	Red Congo	AlPO4	2.8
C5	MinimumM	AlPO4	1.56		C5	Manita	AlPO4	1.55		C5	Red Congo	AlPO4	5
C5	MinimumM	AlPO4	0.77		C5	Manita	AlPO4	0.8		C5	Red Congo	AlPO4	3.9
C55	MinimumM	AlPO4	1.73		C55	Manita	AlPO4	1.28		C55	Red Congo	AlPO4	5.2
C55	MinimumM	AlPO4	1.4		C55	Manita	AlPO4	0.76		C55	Red Congo	AlPO4	3.6
C55	MinimumM	AlPO4	2.36		C55	Manita	AlPO4	0.9		C55	Red Congo	AlPO4	3.9
A10	MinimumM	AlPO4	1.23		A10	Manita	AlPO4	1		A10	Red Congo	AlPO4	1.3
A10	MinimumM	AlPO4	1.1		A10	Manita	AlPO4	0.76		A10	Red Congo	AlPO4	0.9
A10	MinimumM	AlPO4	0.65		A10	Manita	AlPO4	0.42		A10	Red Congo	AlPO4	2.2
A11	MinimumM	AlPO4	2.1		A11	Manita	AlPO4	nc		A11	Red Congo	AlPO4	2
A11	MinimumM	AlPO4	1.12		A11	Manita	AlPO4	nc		A11	Red Congo	AlPO4	2.6
A11	MinimumM	AlPO4	1.74		A11	Manita	AlPO4	nc		A11	Red Congo	AlPO4	1.5
A4	MinimumM	AlPO4	0.55		A4	Manita	AlPO4	nc		A4	Red Congo	AlPO4	2.76
A4	MinimumM	AlPO4	1.02		A4	Manita	AlPO4	nc		A4	Red Congo	AlPO4	2.3
A4	MinimumM	AlPO4	1.26		A4	Manita	AlPO4	nc		A4	Red Congo	AlPO4	1.2
C11	MinimumM	AlPO4	2.95		C11	Manita	AlPO4	1.61		C11	Red Congo	AlPO4	3.08
C11	MinimumM	AlPO4	1.82		C11	Manita	AlPO4	2.11		C11	Red Congo	AlPO4	2.85
C11	MinimumM	AlPO4	2.1		C11	Manita	AlPO4	2.65		C11	Red Congo	AlPO4	5.1
C17	MinimumM	AlPO4	1.45		C17	Manita	AlPO4	0.86		C17	Red Congo	AlPO4	4.1
C17	MinimumM	AlPO4	2.24		C17	Manita	AlPO4	1.95		C17	Red Congo	AlPO4	2.3
C17	MinimumM	AlPO4	1.45		C17	Manita	AlPO4	1.75		C17	Red Congo	AlPO4	3.3
A5	MinimumM	AlPO4	1.02		A5	Manita	AlPO4	1.55		A5	Red Congo	AlPO4	2.4
A5	MinimumM	AlPO4	1.27		A5	Manita	AlPO4	1.77		A5	Red Congo	AlPO4	2.5
A5	MinimumM	AlPO4	0.76		A5	Manita	AlPO4	2.63		A5	Red Congo	AlPO4	1.2
A3	MinimumM	AlPO4	1.59		A3	Manita	AlPO4	nc		A3	Red Congo	AlPO4	2
A3	MinimumM	AlPO4	1.86		A3	Manita	AlPO4	nc		A3	Red Congo	AlPO4	3
A3	MinimumM	AlPO4	1.1		A3	Manita	AlPO4	nc		A3	Red Congo	AlPO4	4.1
C5	MinimumM	FePO4	1.15		C5	Manita	FePO4	0.4		C5	Red Congo	FePO4	3.8
C5	MinimumM	FePO4	1.42		C5	Manita	FePO4	0.83		C5	Red Congo	FePO4	3.1
C5	MinimumM	FePO4	0.78		C5	Manita	FePO4	0.3		C5	Red Congo	FePO4	1.6
C55	MinimumM	FePO4	1.32		C55	Manita	FePO4	1		C55	Red Congo	FePO4	2.1
C55	MinimumM	FePO4	0.93		C55	Manita	FePO4	0.61		C55	Red Congo	FePO4	1.5
C55	MinimumM	FePO4	0.78		C55	Manita	FePO4	0.5		C55	Red Congo	FePO4	2.8
A10	MinimumM	FePO4	nc		A10	Manita	FePO4	nc		A10	Red Congo	FePO4	0.61
A10	MinimumM	FePO4	nc		A10	Manita	FePO4	nc		A10	Red Congo	FePO4	1.3
A10	MinimumM	FePO4	nc		A10	Manita	FePO4	nc		A10	Red Congo	FePO4	1.13
A11	MinimumM	FePO4	nc		A11	Manita	FePO4	1.4		A11	Red Congo	FePO4	1
A11	MinimumM	FePO4	nc		A11	Manita	FePO4	0.74		A11	Red Congo	FePO4	0.54
A11	MinimumM	FePO4	nc		A11	Manita	FePO4	0.78		A11	Red Congo	FePO4	1.6
A4	MinimumM	FePO4	nc		A4	Manita	FePO4	nc		A4	Red Congo	FePO4	0.72
A4	MinimumM	FePO4	nc		A4	Manita	FePO4	nc		A4	Red Congo	FePO4	0.2
A4	MinimumM	FePO4	nc		A4	Manita	FePO4	nc		A4	Red Congo	FePO4	0.6
C11	MinimumM	FePO4	1.59		C11	Manita	FePO4	2.48		C11	Red Congo	FePO4	4
C11	MinimumM	FePO4	1.86		C11	Manita	FePO4	1.66		C11	Red Congo	FePO4	2.36
C11	MinimumM	FePO4	1.1		C11	Manita	FePO4	1.78		C11	Red Congo	FePO4	2.7
C17	MinimumM	FePO4	0.95		C17	Manita	FePO4	0.25		C17	Red Congo	FePO4	1.8
C17	MinimumM	FePO4	1.54		C17	Manita	FePO4	0.91		C17	Red Congo	FePO4	4.25
C17	MinimumM	FePO4	1.09		C17	Manita	FePO4	0.54		C17	Red Congo	FePO4	2.9
A5	MinimumM	FePO4	0.95		A5	Manita	FePO4	0.8		A5	Red Congo	FePO4	3
A5	MinimumM	FePO4	1.31		A5	Manita	FePO4	1.5		A5	Red Congo	FePO4	3.4
A5	MinimumM	FePO4	0.63		A5	Manita	FePO4	0.8		A5	Red Congo	FePO4	1.86527
A3	MinimumM	FePO4	nc		A3	Manita	FePO4	0.6		A3	Red Congo	FePO4	3.3
A3	MinimumM	FePO4	nc		A3	Manita	FePO4	0.65		A3	Red Congo	FePO4	2.3
A3	MinimumM	FePO4	nc		A3	Manita	FePO4	1.1		A3	Red Congo	FePO4	2

## Sheet: Germination data
Isolations	Germination (%)
C11	69
C11	64
C11	67
IR94MF1	56
IR94MF1	60
IR94MF1	58
A4	47
A4	46
A4	46
A11	53
A11	48
A11	51
A3	51
A3	50
A3	50
A10	46
A10	44
A10	45
A5	53
A5	50
A5	52
C5	48
C5	50
C5	49
C55	49
C55	53
C55	51
C17	54
C17	55
C17	55
Control	53
Control	55
Control	54

## Sheet: Greenhouse data
Cuts	Inoculant	Application PR	Shoot dry weight g/pot	N uptake mg/pot	P uptake P/pot				Inoculant	Application PR	Dry weight root g/pot
1	No inocula	Sin RF	2.13	16.9974	4.87796				No inocula	Sin RF	4
1	No inocula	Sin RF	2.69	19.9598	6.13857				No inocula	Sin RF	3.05
1	No inocula	Sin RF	2.28	12.4488	4.9713				No inocula	Sin RF	3.77
1	No inocula	Sin RF	2.92	20.44	6.99966				No inocula	Sin RF	3.23
1	No inocula	Sin RF	2.24	18.1888	4.4016				No inocula	Sin RF	2.55
1	No inocula	Sin RF	2.22	15.6436	5.49157				No inocula	Sin RF	4.35
1	No inocula	Sin RF	2.17	13.671	4.83287				No inocula	Sin RF	3.94
1	IR94MF1	Sin RF	2.94	25.1076	6.27893				IR94MF1	Sin RF	4.2
1	IR94MF1	Sin RF	2.21	18.2546	4.94741				IR94MF1	Sin RF	5.51
1	IR94MF1	Sin RF	2.36	13.8768	5.15212				IR94MF1	Sin RF	4.75
1	IR94MF1	Sin RF	2.28	27.132	5.27553				IR94MF1	Sin RF	4.41
1	IR94MF1	Sin RF	2.94	30.4584	7.48371				IR94MF1	Sin RF	4.09
1	IR94MF1	Sin RF	2.77	23.6558	5.77702				IR94MF1	Sin RF	4.06
1	IR94MF1	Sin RF	2.86	18.018	6.52457				IR94MF1	Sin RF	3.4
1	IR+A11	Sin RF	2	12.88	4.82002				IR+A11	Sin RF	4.43
1	IR+A11	Sin RF	2.27	17.1612	5.32773				IR+A11	Sin RF	5.33
1	IR+A11	Sin RF	1.92	15.0528	5.05639				IR+A11	Sin RF	4.18
1	IR+A11	Sin RF	2.39	19.4068	6.79761				IR+A11	Sin RF	2.25
1	IR+A11	Sin RF	1.91	12.8352	4.54879				IR+A11	Sin RF	4.09
1	IR+A11	Sin RF	1.6	11.2	4.54745				IR+A11	Sin RF	3.74
1	IR+A11	Sin RF	1.93	10.2676	4.39118				IR+A11	Sin RF	3.19
1	IR+17	Sin RF	1.98	15.246	5.03335				IR+17	Sin RF	4.08
1	IR+17	Sin RF	3.25	25.48	7.54196				IR+17	Sin RF	5.67
1	IR+17	Sin RF	2.99	25.9532	6.99734				IR+17	Sin RF	4.37
1	IR+17	Sin RF	2.83	23.772	7.04461				IR+17	Sin RF	6.63
1	IR+17	Sin RF	2.35	33.229	5.78928				IR+17	Sin RF	6.16
1	IR+17	Sin RF	1.65	15.5155	4.63368				IR+17	Sin RF	7.61
1	IR+17	Sin RF	3.17	30.6222	7.90813				IR+17	Sin RF	6.51
1	IR+55	Sin RF	2.33	21.203	6.70744				IR+55	Sin RF	4.15
1	IR+55	Sin RF	2	13.16	4.85525				IR+55	Sin RF	4.95
1	IR+55	Sin RF	2.95	22.715	7.44523				IR+55	Sin RF	4.4
1	IR+55	Sin RF	2.45	13.72	6.26796				IR+55	Sin RF	4.24
1	IR+55	Sin RF	2.33	16.6362	5.96569				IR+55	Sin RF	4.79
1	IR+55	Sin RF	2.22	15.4882	6.48552				IR+55	Sin RF	4.79
1	IR+55	Sin RF	2.19	12.5706	6.20059				IR+55	Sin RF	5.07
1	IR+5	Sin RF	2.18	15.26	5.40296				IR+5	Sin RF	4.01
1	IR+5	Sin RF	2.06	13.5548	4.51952				IR+5	Sin RF	4.19
1	IR+5	Sin RF	2.08	14.2688	5.70176				IR+5	Sin RF	4.68
1	IR+5	Sin RF	1.81	13.937	4.86355				IR+5	Sin RF	3.67
1	IR+5	Sin RF	2.01	14.9142	5.35603				IR+5	Sin RF	4.48
1	IR+5	Sin RF	1.91	13.3254	3.95626				IR+5	Sin RF	5.77
1	IR+5	Sin RF	1.94	15.4812	5.3193				IR+5	Sin RF	4.3
1	IR+Azoto	Sin RF	1.72	11.0768	5.73781				IR+Azoto	Sin RF	3.8
1	IR+Azoto	Sin RF	3.01	28.2338	8.30412				IR+Azoto	Sin RF	2.65
1	IR+Azoto	Sin RF	1.89	12.4362	5.56626				IR+Azoto	Sin RF	3.41
1	IR+Azoto	Sin RF	1.6	12.096	4.76745				IR+Azoto	Sin RF	4.33
1	IR+Azoto	Sin RF	1.5	11.97	4.37499				IR+Azoto	Sin RF	3.52
1	IR+Azoto	Sin RF	1.35	8.316	4.55655				IR+Azoto	Sin RF	4.32
1	IR+Azoto	Sin RF	1.58	11.613	5.50087				IR+Azoto	Sin RF	3.33
1	No inocula	Con RF	1.91	13.1026	4.41942				No inocula	Con RF	3.18
1	No inocula	Con RF	2.29	18.2742	4.69219				No inocula	Con RF	4.31
1	No inocula	Con RF	2.73	25.2252	6.19841				No inocula	Con RF	3.62
1	No inocula	Con RF	3.35	28.14	8.02362				No inocula	Con RF	3.35
1	No inocula	Con RF	2.78	22.5736	6.15188				No inocula	Con RF	2.91
1	No inocula	Con RF	2.45	20.58	5.40005				No inocula	Con RF	3.58
1	No inocula	Con RF	2.84	23.1933	6.48856				No inocula	Con RF	3.57
1	IR94MF1	Con RF	2.6	24.388	5.07906				IR94MF1	Con RF	4.43
1	IR94MF1	Con RF	2.54	26.67	5.92014				IR94MF1	Con RF	5.36
1	IR94MF1	Con RF	2.32	19.1632	5.71066				IR94MF1	Con RF	4.18
1	IR94MF1	Con RF	2.81	27.538	6.37624				IR94MF1	Con RF	4.48
1	IR94MF1	Con RF	2.42	26.0876	4.52582				IR94MF1	Con RF	4.33
1	IR94MF1	Con RF	2.13	29.2236	4.61538				IR94MF1	Con RF	3.91
1	IR94MF1	Con RF	2.7	28.098	6.57653				IR94MF1	Con RF	4.66
1	IR+A11	Con RF	2.31	19.0806	6.50123				IR+A11	Con RF	2.78
1	IR+A11	Con RF	1.87	13.09	5.2135				IR+A11	Con RF	3.02
1	IR+A11	Con RF	1.76	14.784	4.37395				IR+A11	Con RF	3.44
1	IR+A11	Con RF	2.2	20.944	4.62401				IR+A11	Con RF	3.23
1	IR+A11	Con RF	1.69	10.647	3.79934				IR+A11	Con RF	4.11
1	IR+A11	Con RF	1.86	14.322	4.63758				IR+A11	Con RF	4.64
1	IR+A11	Con RF	1.85	14.5472	4.79936				IR+A11	Con RF	3.03
1	IR+17	Con RF	2.2	32.34	5.20815				IR+17	Con RF	6.51
1	IR+17	Con RF	2.42	28.798	6.59116				IR+17	Con RF	3.83
1	IR+17	Con RF	2.83	32.8846	6.87209				IR+17	Con RF	5.24
1	IR+17	Con RF	2.77	29.4728	6.03782				IR+17	Con RF	3.62
1	IR+17	Con RF	2.63	33.8744	6.90482				IR+17	Con RF	4.05
1	IR+17	Con RF	1.9	14.63	4.89175				IR+17	Con RF	3.63
1	IR+17	Con RF	2.26	26.1557	5.84157				IR+17	Con RF	1.94
1	IR+55	Con RF	1.61	11.4954	4.16147				IR+55	Con RF	3.56
1	IR+55	Con RF	1.89	14.8176	5.14124				IR+55	Con RF	5.37
1	IR+55	Con RF	2.41	15.5204	6.14277				IR+55	Con RF	4.11
1	IR+55	Con RF	2.18	19.2276	4.7001				IR+55	Con RF	3.73
1	IR+55	Con RF	1.32	9.0552	3.00955				IR+55	Con RF	1.53
1	IR+55	Con RF	1.76	20.2048	4.02108				IR+55	Con RF	3.52
1	IR+55	Con RF	2.04	16.5172	6.22635				IR+55	Con RF	3.29
1	IR+5	Con RF	2.38	18.9924	5.41019				IR+5	Con RF	2.97
1	IR+5	Con RF	1.86	14.5824	4.51538				IR+5	Con RF	2.84
1	IR+5	Con RF	1.84	14.168	4.64629				IR+5	Con RF	3.12
1	IR+5	Con RF	2.25	19.845	5.10248				IR+5	Con RF	3.72
1	IR+5	Con RF	2.1	14.406	4.64426				IR+5	Con RF	3.77
1	IR+5	Con RF	2.25	18.27	5.35395				IR+5	Con RF	3.24
1	IR+5	Con RF	2.07	16.3254	4.88918				IR+5	Con RF	3.16
1	IR+Azoto	Con RF	1.35	12.285	3.12093				IR+Azoto	Con RF	3.35
1	IR+Azoto	Con RF	2.49	20.916	4.98898				IR+Azoto	Con RF	3.84
1	IR+Azoto	Con RF	2.33	17.941	5.59639				IR+Azoto	Con RF	4.6
1	IR+Azoto	Con RF	2.18	22.5848	5.42364				IR+Azoto	Con RF	4.69
1	IR+Azoto	Con RF	1.91	15.7766	5.19823				IR+Azoto	Con RF	4.97
1	IR+Azoto	Con RF	2.12	22.8536	4.60377				IR+Azoto	Con RF	4.41
1	IR+Azoto	Con RF	2.4	21.84	6.25058				IR+Azoto	Con RF	4.65
2	No inocula	Sin RF	1.81	11.403	5.69722
2	No inocula	Sin RF	1.72	13.244	4.57046
2	No inocula	Sin RF	1.57	9.6712	4.7089
2	No inocula	Sin RF	2.17	12.4558	6.67898
2	No inocula	Sin RF	1.85	10.101	5.9359
2	No inocula	Sin RF	2.05	13.202	6.05275
2	No inocula	Sin RF	1.79	11.277	5.54455
2	IR94MF1	Sin RF	1.2	6.216	3.6463
2	IR94MF1	Sin RF	1.75	13.23	5.22032
2	IR94MF1	Sin RF	1.98	12.474	6.07406
2	IR94MF1	Sin RF	2.46	15.1536	7.07168
2	IR94MF1	Sin RF	1.66	6.7396	4.87089
2	IR94MF1	Sin RF	1.94	12.222	5.53875
2	IR94MF1	Sin RF	1.82	10.7016	5.92471
2	IR+A11	Sin RF	1.68	12.2304	4.96372
2	IR+A11	Sin RF	1.44	9.8784	4.31411
2	IR+A11	Sin RF	1.48	14.0896	4.5372
2	IR+A11	Sin RF	1.41	8.6856	4.39232
2	IR+A11	Sin RF	1.95	14.742	5.70466
2	IR+A11	Sin RF	1.71	13.6458	4.97823
2	IR+A11	Sin RF	1.81	13.6836	4.96653
2	IR+17	Sin RF	2.51	16.8672	7.50444
2	IR+17	Sin RF	1.63	12.3228	4.11049
2	IR+17	Sin RF	1.7	11.662	5.11378
2	IR+17	Sin RF	2.03	13.6416	6.17245
2	IR+17	Sin RF	1.91	13.1026	6.34447
2	IR+17	Sin RF	1.83	16.3968	5.75893
2	IR+17	Sin RF	2.2	16.016	6.22741
2	IR+55	Sin RF	1.58	14.1568	5.33713
2	IR+55	Sin RF	1.5	9.87	5.34935
2	IR+55	Sin RF	1.36	8.568	4.52582
2	IR+55	Sin RF	1.71	10.5336	5.14617
2	IR+55	Sin RF	1.6	9.408	4.3643
2	IR+55	Sin RF	1.65	9.471	5.29307
2	IR+55	Sin RF	1.88	12.3704	5.79149
2	IR+5	Sin RF	1.72	10.836	5.57121
2	IR+5	Sin RF	1.57	12.089	5.04388
2	IR+5	Sin RF	1.71	10.2942	4.29486
2	IR+5	Sin RF	1.52	11.2784	4.71851
2	IR+5	Sin RF	1.72	11.7992	4.71725
2	IR+5	Sin RF	1.47	10.4958	4.10528
2	IR+5	Sin RF	1.27	8.7122	4.44739
2	IR+Azoto	Sin RF	1.6	9.856	4.79779
2	IR+Azoto	Sin RF	1.33	7.2618	4.78633
2	IR+Azoto	Sin RF	1.26	9.5256	4.30313
2	IR+Azoto	Sin RF	1.25	8.4	4.32486
2	IR+Azoto	Sin RF	1.97	10.7562	6.41968
2	IR+Azoto	Sin RF	1.13	7.119	3.39686
2	IR+Azoto	Sin RF	1.42	8.946	4.97364
2	No inocula	Con RF	1.65	7.854	6.11898
2	No inocula	Con RF	1.8	7.812	5.86204
2	No inocula	Con RF	1.65	7.392	4.47162
2	No inocula	Con RF	1.77	9.4164	5.23922
2	No inocula	Con RF	1.88	8.6856	5.63995
2	No inocula	Con RF	1.88	9.212	5.97868
2	No inocula	Con RF	2.17	10.3292	6.61136
2	IR94MF1	Con RF	1.95	7.098	5.62806
2	IR94MF1	Con RF	2.07	6.9552	6.51841
2	IR94MF1	Con RF	2.05	10.619	6.30408
2	IR94MF1	Con RF	2.11	7.6804	6.21418
2	IR94MF1	Con RF	1.87	8.3776	5.95194
2	IR94MF1	Con RF	1.9	7.98	5.58928
2	IR94MF1	Con RF	1.73	7.0238	4.37087
2	IR+A11	Con RF	1.33	6.8894	4.52688
2	IR+A11	Con RF	1.54	6.8992	5.55876
2	IR+A11	Con RF	1.6	8.512	5.19011
2	IR+A11	Con RF	1.56	8.2992	4.90291
2	IR+A11	Con RF	1.3	5.642	4.12715
2	IR+A11	Con RF	1.58	7.5208	5.42168
2	IR+A11	Con RF	1.71	8.379	5.98706
2	IR+17	Con RF	2.3	10.626	7.13051
2	IR+17	Con RF	1.68	8.232	5.59982
2	IR+17	Con RF	1.85	8.806	5.51362
2	IR+17	Con RF	2.1	9.996	6.75228
2	IR+17	Con RF	2.66	11.5444	8.24479
2	IR+17	Con RF	1.55	8.029	3.893
2	IR+17	Con RF	1.76	8.3776	6.25273
2	IR+55	Con RF	2.1	8.526	6.80917
2	IR+55	Con RF	1.56	8.0808	5.18715
2	IR+55	Con RF	1.32	7.7616	4.42936
2	IR+55	Con RF	1.83	11.0166	5.49987
2	IR+55	Con RF	1.71	7.4214	6.04382
2	IR+55	Con RF	1.48	7.8736	4.21641
2	IR+55	Con RF	1.3	6.734	4.43798
2	IR+5	Con RF	1.66	10.6904	5.21945
2	IR+5	Con RF	2	11.76	5.99182
2	IR+5	Con RF	1.42	7.7532	4.66585
2	IR+5	Con RF	1.46	8.9936	4.5728
2	IR+5	Con RF	1.7	10.234	4.58985
2	IR+5	Con RF	1.65	9.471	4.45709
2	IR+5	Con RF	1.33	8.0066	4.49625
2	IR+Azoto	Con RF	1.27	8.001	4.41556
2	IR+Azoto	Con RF	1.75	10.535	6.67474
2	IR+Azoto	Con RF	1.77	6.9384	6.71146
2	IR+Azoto	Con RF	1.45	9.541	4.51791
2	IR+Azoto	Con RF	1.91	8.022	6.52171
2	IR+Azoto	Con RF	1.7	6.902	6.1812
2	IR+Azoto	Con RF	1.44	7.4592	4.98029

## Sheet: Field data
Subjets (random)	Cuts	Inoculant	Application PR	Forage Mass kgDM/ha	Growth rate DM/ha/d	N Uptake kg/ha	P Uptake kg/ha	N plant (%)	P plant (%)			Inoculant	Application PR	Annual yield DM	N uptake kg/ha/year	P uptake kg/ha/year
1	1	No Inoculated	sin RF	1074	38.3571	10.0741	3.28017	0.938	0.305416			No Inoculated	sin RF	5818	37.232	19.612
2	1	No Inoculated	sin RF	1248.8	44.6	12.7627	3.96883	1.022	0.317812			No Inoculated	sin RF	5443.6	41.8659	17.0162
3	1	No Inoculated	sin RF	991.6	35.4143	8.60709	2.34544	0.868	0.236531			No Inoculated	sin RF	7299.2	47.8994	22.386
4	1	No Inoculated	sin RF	1070.4	38.2286	6.1441	3.17275	0.574	0.296408			No Inoculated	sin RF	6344.4	46.3814	20.4821
5	1	No Inoculated	sin RF	1254	44.7857	8.778	4.0015	0.7	0.319099			No Inoculated	sin RF	6193.6	41.6634	18.531
6	1	No Inoculated	sin RF	1764	63	10.8662	5.18562	0.616	0.293969			No Inoculated	sin RF	6737.2	43.1392	19.9956
7	1	No Inoculated	con RF	998.4	35.6571	9.22522	3.4131	0.924	0.341857			No Inoculated	con RF	5187.2	40.1507	16.6177
8	1	No Inoculated	con RF	812.8	29.0286	8.42061	3.03186	1.036	0.373015			No Inoculated	con RF	5866	47.7596	19.405
9	1	No Inoculated	con RF	782.4	27.9429	6.46262	3.03347	0.826	0.387713			No Inoculated	con RF	6138.8	39.6035	20.259
10	1	No Inoculated	con RF	950.8	33.9571	7.05494	3.47836	0.742	0.365835			No Inoculated	con RF	5972.8	40.4792	20.3246
11	1	No Inoculated	con RF	1464.8	52.3143	13.7398	5.55917	0.938	0.379517			No Inoculated	con RF	5935.6	47.2596	19.3998
12	1	No Inoculated	con RF	1631.6	58.2714	12.3349	5.35008	0.756	0.327904			No Inoculated	con RF	7020	49.9373	23.5479
13	1	IR94MF1	sin RF	1467.2	52.4	13.9677	4.69672	0.952	0.320115			IR94MF1	sin RF	7365.2	58.3663	25.6339
14	1	IR94MF1	sin RF	1516.4	54.1571	13.7992	5.17057	0.91	0.340977			IR94MF1	sin RF	8038.4	52.135	26.0454
15	1	IR94MF1	sin RF	1086.8	38.8143	6.54254	3.43484	0.602	0.316051			IR94MF1	sin RF	7103.2	50.446	20.405
16	1	IR94MF1	sin RF	1537.2	54.9	15.7102	5.15507	1.022	0.335355			IR94MF1	sin RF	8015.2	57.1397	27.1828
17	1	IR94MF1	sin RF	1310.8	46.8143	8.80858	4.43223	0.672	0.338132			IR94MF1	sin RF	6568.4	47.0821	19.9418
18	1	IR94MF1	sin RF	1178	42.0714	7.4214	3.33689	0.63	0.283267			IR94MF1	sin RF	7009.6	48.7444	22.3618
19	1	IR94MF1	con RF	3022.8	107.957	22.8524	9.78084	0.756	0.323569			IR94MF1	con RF	9773.2	78.3193	36.8317
20	1	IR94MF1	con RF	2169.6	77.4857	22.1733	8.43827	1.022	0.388932			IR94MF1	con RF	8196.8	64.5513	31.2721
21	1	IR94MF1	con RF	997.2	35.6143	5.86354	3.58056	0.588	0.359062			IR94MF1	con RF	7413.6	48.1643	29.3209
22	1	IR94MF1	con RF	617.6	22.0571	4.15027	1.90466	0.672	0.308397			IR94MF1	con RF	7046	49.6199	26.1784
23	1	IR94MF1	con RF	1713.2	61.1857	15.3503	5.2997	0.896	0.309345			IR94MF1	con RF	7782.8	61.7696	26.6365
24	1	IR94MF1	con RF	2186.4	78.0857	20.2023	7.21372	0.924	0.329936			IR94MF1	con RF	7708	57.1305	26.25
25	1	IR94_17	sin RF	736.4	26.3	5.46409	2.72693	0.742	0.370305			IR94_17	sin RF	6464	51.3711	23.5225
26	1	IR94_17	sin RF	1624	58	14.3237	5.87956	0.882	0.362042			IR94_17	sin RF	9128.4	76.9453	33.942
27	1	IR94_17	sin RF	841.6	30.0571	6.59814	3.07545	0.784	0.365429			IR94_17	sin RF	7766	52.8209	21.9614
28	1	IR94_17	sin RF	1691.6	60.4143	15.6304	5.65338	0.924	0.334203			IR94_17	sin RF	8310.8	61.7847	28.5424
29	1	IR94_17	sin RF	952	34	11.0622	2.94367	1.162	0.309209			IR94_17	sin RF	6758	50.7905	20.7151
30	1	IR94_17	sin RF	1082	38.6429	9.0888	3.92242	0.84	0.362516			IR94_17	sin RF	7829.2	64.1031	27.5912
31	1	IR94_17	con RF	2309.6	82.4857	20.694	8.79349	0.896	0.380736			IR94_17	con RF	6865.6	51.9888	25.1742
32	1	IR94_17	con RF	1580.8	56.4571	11.0656	5.46297	0.7	0.345583			IR94_17	con RF	7086	52.2463	25.5443
33	1	IR94_17	con RF	1620.4	57.8714	8.84738	4.83043	0.546	0.298101			IR94_17	con RF	7744.4	50.3826	30.6216
34	1	IR94_17	con RF	974	34.7857	9.81792	3.13771	1.008	0.322147			IR94_17	con RF	6085.6	51.3305	20.928
35	1	IR94_17	con RF	1197.2	42.7571	10.0565	4.15678	0.84	0.347208			IR94_17	con RF	7623.2	59.9054	32.0185
36	1	IR94_17	con RF	862.4	30.8	7.12342	1.69403	0.826	0.196432			IR94_17	con RF	7880	58.4704	28.4078
37	2	No Inoculated	sin RF	1470.8	49.0267	5.55962	4.67836	0.378	0.318083
38	2	No Inoculated	sin RF	1506.8	50.2267	8.43808	4.23969	0.56	0.281371
39	2	No Inoculated	sin RF	2574	85.8	12.2522	7.09777	0.476	0.275749
40	2	No Inoculated	sin RF	2101.2	70.04	13.8259	6.221	0.658	0.296069
41	2	No Inoculated	sin RF	2176.8	72.56	10.9711	5.11489	0.504	0.234973
42	2	No Inoculated	sin RF	1355.6	45.1867	7.59136	3.68939	0.56	0.272159
43	2	No Inoculated	con RF	1181.6	39.3867	8.9329	4.47797	0.756	0.378975
44	2	No Inoculated	con RF	1274.8	42.4933	7.13888	4.18875	0.56	0.328581
45	2	No Inoculated	con RF	1360.4	45.3467	8.38006	3.54304	0.616	0.260441
46	2	No Inoculated	con RF	1274.8	42.4933	6.60346	3.54892	0.518	0.27839
47	2	No Inoculated	con RF	1644.4	54.8133	12.8921	6.0169	0.784	0.365903
48	2	No Inoculated	con RF	1342.8	44.76	8.45964	4.3467	0.63	0.323704
49	2	IR94MF1	sin RF	1732.8	57.76	10.674	5.00587	0.616	0.288889
50	2	IR94MF1	sin RF	2301.6	76.72	12.5667	5.05893	0.546	0.2198
51	2	IR94MF1	sin RF	1822.4	60.7467	8.92976	4.36238	0.49	0.239376
52	2	IR94MF1	sin RF	2031.6	67.72	9.38599	6.62867	0.462	0.326278
53	2	IR94MF1	sin RF	1684.4	56.1467	8.01774	4.81014	0.476	0.28557
54	2	IR94MF1	sin RF	2508.8	83.6267	12.9956	7.48895	0.518	0.298507
55	2	IR94MF1	con RF	1326	44.2	8.16816	3.40674	0.616	0.256919
56	2	IR94MF1	con RF	789.6	26.32	4.31122	2.0757	0.546	0.262879
57	2	IR94MF1	con RF	1784.8	59.4933	12.7435	4.59878	0.714	0.257664
58	2	IR94MF1	con RF	1779.2	59.3067	10.9599	4.58315	0.616	0.257596
59	2	IR94MF1	con RF	1504.8	50.16	8.63755	5.24313	0.574	0.348427
60	2	IR94MF1	con RF	1326.4	44.2133	7.24214	3.07985	0.546	0.232196
61	2	IR94_17	sin RF	1867.2	62.24	15.1617	8.56734	0.812	0.458834
62	2	IR94_17	sin RF	2184	72.8	16.8168	9.17033	0.77	0.419887
63	2	IR94_17	sin RF	2426	80.8667	11.8874	8.40191	0.49	0.346328
64	2	IR94_17	sin RF	2259.2	75.3067	15.4981	8.1211	0.686	0.359468
65	2	IR94_17	sin RF	2147.6	71.5867	11.1246	7.12498	0.518	0.331765
66	2	IR94_17	sin RF	2286.8	76.2267	14.4068	7.60074	0.63	0.332374
67	2	IR94_17	con RF	1059.2	35.3067	5.78323	3.07068	0.546	0.289905
68	2	IR94_17	con RF	1575.6	52.52	6.61752	4.29027	0.42	0.272294
69	2	IR94_17	con RF	1149.2	38.3067	7.07907	3.03424	0.616	0.264031
70	2	IR94_17	con RF	1577.2	52.5733	12.8069	4.18245	0.812	0.265182
71	2	IR94_17	con RF	1384.4	46.1467	11.4351	5.31217	0.826	0.383717
72	2	IR94_17	con RF	1657.2	55.24	11.3684	5.4228	0.686	0.327227
73	3	No Inoculated	sin RF	676.8	19.3371	4.35859	2.09594	0.644	0.309684
74	3	No Inoculated	sin RF	678	19.3714	5.50536	2.28748	0.812	0.337387
75	3	No Inoculated	sin RF	1357.6	38.7886	11.974	4.03506	0.882	0.29722
76	3	No Inoculated	sin RF	780	22.2857	6.2244	2.71773	0.798	0.348427
77	3	No Inoculated	sin RF	644.8	18.4229	5.32605	1.99946	0.826	0.31009
78	3	No Inoculated	sin RF	906.4	25.8971	7.99445	2.26302	0.882	0.249671
79	3	No Inoculated	con RF	917.6	26.2171	7.45091	4.40977	0.812	0.480576
80	3	No Inoculated	con RF	813.2	23.2343	9.33554	1.59518	1.148	0.196161
81	3	No Inoculated	con RF	547.6	15.6457	3.52654	1.81081	0.644	0.330681
82	3	No Inoculated	con RF	497.6	14.2171	4.11018	1.57469	0.826	0.316457
83	3	No Inoculated	con RF	758	21.6571	7.4284	3.04925	0.98	0.402276
84	3	No Inoculated	con RF	721.2	20.6057	8.17841	2.70288	1.134	0.374776
85	3	IR94MF1	sin RF	856.4	24.4686	5.9948	2.2716	0.7	0.26525
86	3	IR94MF1	sin RF	768	21.9429	7.63392	2.86787	0.994	0.373421
87	3	IR94MF1	sin RF	771.2	22.0343	5.83027	1.56712	0.756	0.203206
88	3	IR94MF1	sin RF	1036.4	29.6114	11.3175	2.41701	1.092	0.233212
89	3	IR94MF1	sin RF	958.4	27.3829	9.92902	2.54735	1.036	0.265792
90	3	IR94MF1	sin RF	803.6	22.96	6.97525	1.89586	0.868	0.235921
91	3	IR94MF1	con RF	844.8	24.1371	8.27904	3.15695	0.98	0.373692
92	3	IR94MF1	con RF	861.6	24.6171	8.80555	3.62883	1.022	0.421174
93	3	IR94MF1	con RF	719.2	20.5486	4.83302	2.40895	0.672	0.334948
94	3	IR94MF1	con RF	661.6	18.9029	6.29843	2.25904	0.952	0.341451
95	3	IR94MF1	con RF	821.6	23.4743	7.93666	3.6735	0.966	0.447116
96	3	IR94MF1	con RF	814.8	23.28	4.9051	3.38371	0.602	0.415281
97	3	IR94_17	sin RF	611.2	17.4629	5.04851	1.65971	0.826	0.271549
98	3	IR94_17	sin RF	743.6	21.2457	5.3093	2.54406	0.714	0.342128
99	3	IR94_17	sin RF	828	23.6571	4.6368	2.83114	0.56	0.341925
100	3	IR94_17	sin RF	637.2	18.2057	3.03307	2.61855	0.476	0.410946
101	3	IR94_17	sin RF	650	18.5714	5.005	2.93487	0.77	0.451518
102	3	IR94_17	sin RF	1042	29.7714	7.00224	3.33277	0.672	0.319844
103	3	IR94_17	con RF	645.2	18.4343	6.50362	2.35906	1.008	0.365632
104	3	IR94_17	con RF	1153.6	32.96	11.9513	5.07588	1.036	0.440004
105	3	IR94_17	con RF	917.6	26.2171	7.8363	4.33083	0.854	0.471974
106	3	IR94_17	con RF	714.4	20.4114	6.9011	2.6053	0.966	0.364684
107	3	IR94_17	con RF	814.8	23.28	7.98504	3.09727	0.98	0.380127
108	3	IR94_17	con RF	1125.6	32.16	7.8792	5.50238	0.7	0.48884
109	4	No Inoculated	sin RF	1462	41.7714	8.1872	4.78207	0.56	0.327091
110	4	No Inoculated	sin RF	651.2	18.6057	3.55555	2.80002	0.546	0.429979
111	4	No Inoculated	sin RF	860.4	24.5829	4.45687	3.05615	0.518	0.355201
112	4	No Inoculated	sin RF	597.2	17.0629	3.34432	2.5375	0.56	0.424899
113	4	No Inoculated	sin RF	853.2	24.3771	5.25571	2.48734	0.616	0.291531
114	4	No Inoculated	sin RF	1050.4	30.0114	5.29402	3.34541	0.504	0.318489
115	4	No Inoculated	con RF	878.4	25.0971	3.68928	1.79983	0.42	0.204899
116	4	No Inoculated	con RF	1010	28.8571	4.5248	3.1066	0.448	0.307584
117	4	No Inoculated	con RF	1220.4	34.8686	5.63825	2.8486	0.462	0.233415
118	4	No Inoculated	con RF	1326	37.8857	8.16816	4.44052	0.616	0.334881
119	4	No Inoculated	con RF	862	24.6286	3.74108	1.14791	0.434	0.133169
120	4	No Inoculated	con RF	1392	39.7714	6.62592	3.61025	0.476	0.259357
121	4	IR94MF1	sin RF	1889.2	53.9771	14.8113	7.50382	0.784	0.397196
122	4	IR94MF1	sin RF	1222.8	34.9371	5.64934	4.17526	0.462	0.341451
123	4	IR94MF1	sin RF	1555.6	44.4457	13.7204	3.74691	0.882	0.240866
124	4	IR94MF1	sin RF	1120.4	32.0114	5.01939	4.136	0.448	0.369154
125	4	IR94MF1	sin RF	1237.6	35.36	9.52952	3.92066	0.77	0.316796
126	4	IR94MF1	sin RF	1274.4	36.4114	11.4186	5.05496	0.896	0.396654
127	4	IR94MF1	con RF	2052.4	58.64	20.9755	9.73545	1.022	0.474345
128	4	IR94MF1	con RF	2060.4	58.8686	12.4036	9.02816	0.602	0.438175
129	4	IR94MF1	con RF	2196.8	62.7657	11.9945	10.4576	0.546	0.476038
130	4	IR94MF1	con RF	1858.4	53.0971	13.0088	8.43508	0.7	0.453889
131	4	IR94MF1	con RF	2035.2	58.1486	13.1067	5.61755	0.644	0.27602
132	4	IR94MF1	con RF	1648	47.0857	13.3818	4.98526	0.812	0.302504
133	4	IR94_17	sin RF	1188.4	33.9543	6.65504	3.49836	0.56	0.294376
134	4	IR94_17	sin RF	2330	66.5714	15.3314	8.23041	0.658	0.353236
135	4	IR94_17	sin RF	1862	53.2	11.4699	1.94485	0.616	0.104449
136	4	IR94_17	sin RF	996.4	28.4686	7.39329	2.77726	0.742	0.278729
137	4	IR94_17	sin RF	1696.4	48.4686	10.9248	2.54748	0.644	0.15017
138	4	IR94_17	sin RF	1284.4	36.6971	7.9119	3.96279	0.616	0.308532
139	4	IR94_17	con RF	1504.8	42.9943	8.63755	5.66817	0.574	0.376672
140	4	IR94_17	con RF	1135.6	32.4457	6.9953	3.9029	0.616	0.343686
141	4	IR94_17	con RF	1555.6	44.4457	8.05801	6.99537	0.518	0.44969
142	4	IR94_17	con RF	1254.8	35.8514	11.0673	5.1387	0.882	0.409523
143	4	IR94_17	con RF	1502	42.9143	11.3551	5.9903	0.756	0.398821
144	4	IR94_17	con RF	2391.2	68.32	15.0646	7.96393	0.63	0.333052
145	5	No Inoculated	sin RF	1134.4	37.8133	9.05251	4.77549	0.714	0.42097
146	5	No Inoculated	sin RF	1358.8	45.2933	11.6042	3.72018	0.728	0.273784
147	5	No Inoculated	sin RF	1515.6	50.52	10.6092	5.85154	0.742	0.386087
148	5	No Inoculated	sin RF	1795.6	59.8533	16.8427	5.83311	0.714	0.324856
149	5	No Inoculated	sin RF	1264.8	42.16	11.3326	4.92778	0.98	0.38961
150	5	No Inoculated	sin RF	1660.8	55.36	11.3931	5.5122	0.658	0.3319
151	5	No Inoculated	con RF	1211.2	40.3733	10.8524	2.51701	0.896	0.207812
152	5	No Inoculated	con RF	1955.2	65.1733	18.3398	7.48257	0.938	0.382701
153	5	No Inoculated	con RF	2228	74.2667	15.596	9.02307	0.7	0.404985
154	5	No Inoculated	con RF	1923.6	64.12	14.5424	7.28215	0.756	0.378569
155	5	No Inoculated	con RF	1206.4	40.2133	9.45818	3.62652	0.784	0.300607
156	5	No Inoculated	con RF	1932.4	64.4133	14.3384	7.53798	0.742	0.390084
157	5	IR94MF1	sin RF	1419.6	47.32	12.9184	6.15591	0.77	0.433637
158	5	IR94MF1	sin RF	2229.6	74.32	12.4858	8.77282	0.952	0.39347
159	5	IR94MF1	sin RF	1867.2	62.24	15.4231	7.29376	0.742	0.390626
160	5	IR94MF1	sin RF	2289.6	76.32	15.7067	8.84606	0.686	0.386358
161	5	IR94MF1	sin RF	1377.2	45.9067	10.7972	4.23138	0.7	0.307245
162	5	IR94MF1	sin RF	1244.8	41.4933	9.9335	4.58511	0.924	0.368341
163	5	IR94MF1	con RF	2527.2	84.24	18.0442	10.7517	0.924	0.425441
164	5	IR94MF1	con RF	2315.6	77.1867	16.8576	8.10112	1.12	0.34985
165	5	IR94MF1	con RF	1715.6	57.1867	12.7298	8.27498	1.008	0.482337
166	5	IR94MF1	con RF	2129.2	70.9733	15.2025	8.99647	0.742	0.422528
167	5	IR94MF1	con RF	1708	56.9333	16.7384	6.80262	0.966	0.39828
168	5	IR94MF1	con RF	1732.4	57.7467	11.3992	7.58742	1.204	0.437972
169	5	IR94_17	sin RF	2060.8	68.6933	19.0418	7.07012	0.798	0.343076
170	5	IR94_17	sin RF	2246.8	74.8933	25.1642	8.11762	0.854	0.361297
171	5	IR94_17	sin RF	1808.4	60.28	18.2287	5.70811	0.7	0.315644
172	5	IR94_17	sin RF	2726.4	90.88	20.2299	9.3721	0.938	0.343754
173	5	IR94_17	sin RF	1312	43.7333	12.6739	5.16411	0.896	0.393606
174	5	IR94_17	sin RF	2134	71.1333	25.6934	8.77247	0.686	0.411081
175	5	IR94_17	con RF	1346.8	44.8933	10.3704	5.28284	0.91	0.392251
176	5	IR94_17	con RF	1640.4	54.68	15.6166	6.81227	0.56	0.415281
177	5	IR94_17	con RF	2501.6	83.3867	18.5619	11.4307	0.826	0.456937
178	5	IR94_17	con RF	1565.2	52.1733	10.7373	5.86387	0.686	0.37464
179	5	IR94_17	con RF	2724.8	90.8267	19.0736	13.462	0.784	0.494055
180	5	IR94_17	con RF	1843.6	61.4533	17.0349	7.8247	0.798	0.424425

## Sheet: Weather data
Data provided by the Santo Domingo weather station - Venezuelan Air Force
			Monthly daily temperature (°C)
Year	Month	Monthly accumulated rainfall (mm)	Mean	Minimum	Maximun
2007	January	139.1	24.8
2007	February	129.9	24.9
2007	March	4.9	24.5
2007	April	276.8	25.3
2007	May	538.8	24.8
2007	June	378.7	23.8
2007	July	347.3	24.2
2007	August	154.8	24.3
2007	September	231.7	24.1
2007	October	328.8	24.8	20	30
2007	November	234.5	24.8	21	30
2007	December	132.8	24	21	31
2008	January	11.5	23.4	21	30
2008	February	150	24.1	21	29
2008	March	97.4	24.1	20	30
2008	April	435.8	25.8	21	31
2008	May	427.2	24.5
2008	June	251.5	23.9
2008	July	274.5	23.2
2008	August	274.5	23.7
2008	September	236.3	24.5
2008	October	835.2	24.9
2008	November	174.8	25
2008	December	110.6	23.9
